# Supplementary material for: Binding of Calcium and Magnesium Ions to Terrestrial Chromophoric Dissolved Organic Matter (CDOM): A Combination of Steady-State and Time-Resolved Fluorescence Study
Source: MDPI journal article supplement (doi:10.3390/w13162182), 2021-08-09
Supplement: s1 [file s1]

Archive with 1 entries (1 files):
- water-1300369-supplementary.pdf
