# Supplementary material for: Binding of Calcium and Magnesium Ions to Terrestrial Chromophoric Dissolved Organic Matter (CDOM): A Combination of Steady-State and Time-Resolved Fluorescence Study
Source: MDPI journal article supplement (doi:10.3390/w13162182), 2021-08-09
Supplement: s1 [file s1 › water-1300369-supplementary.pdf]

# Binding of Calcium and Magnesium Ions to Terrestrial Chromophoric Dissolved Organic Matter (CDOM): A Combination of Steady-State and Time-Resolved Fluorescence Study

Juan Liu<sup>#</sup>, Ruiya Zhou<sup>#</sup> and Xu Zhang<sup>\*</sup>

Department of Environmental Science, School of Resources and Environmental Science, Wuhan University, Wuhan 430079, China; juanliu@whu.edu.cn (J.L.); ruiyazhou@whu.edu.cn (R.Z.)

<sup>\*</sup> Correspondence: xuzhangwhu@gmail.com

## SUPPORTTING INFORMATION

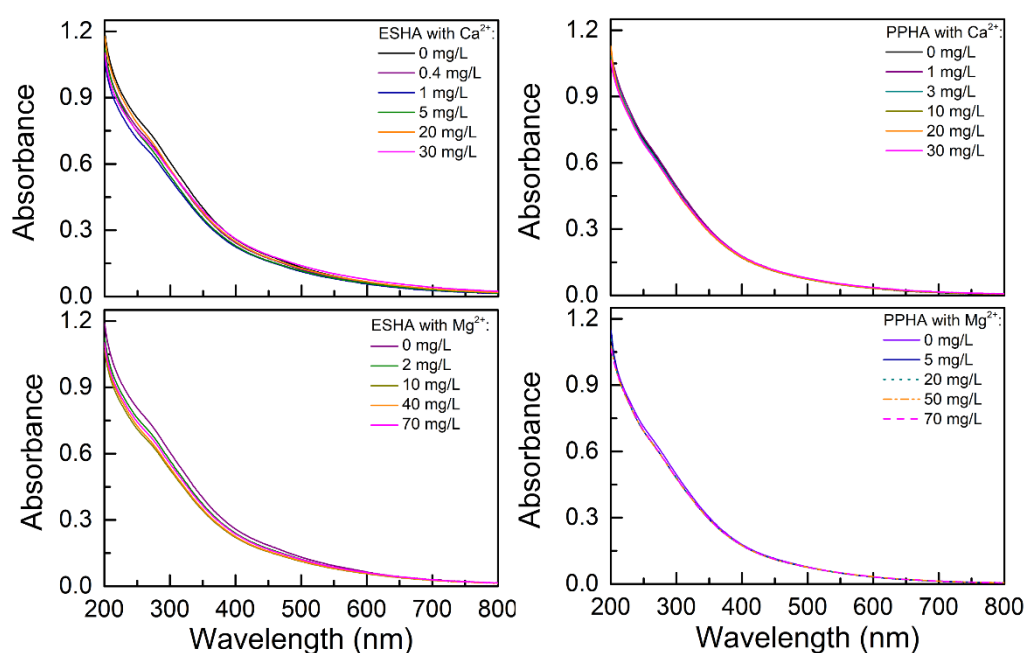

**Figure S1.** Absorption spectra of ESHA and PPHA (10 mg C/L) in the presence of  $Mg^{2+}$  and  $Ca^{2+}$ .

**Citation:** Liu, J.; Zhou, R.; Zhang, X. Binding of Calcium and Magnesium Ions to Terrestrial Chromophoric Dissolved Organic Matter (CDOM): A Combination of Steady-State and Time-Resolved Fluorescence Study. *Water* **2021**, *13*, 2182. <https://doi.org/10.3390/w13162182>

Academic Editor: Micòl Mastroicco

Received: 30 June 2021

Accepted: 5 August 2021

Published: 9 August 2021

**Publisher's Note:** MDPI stays neutral with regard to jurisdictional claims in published maps and institutional affiliations.

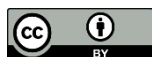

**Copyright:** © 2021 by the authors. Licensee MDPI, Basel, Switzerland. This article is an open access article distributed under the terms and conditions of the Creative Commons Attribution (CC BY) license (<http://creativecommons.org/licenses/by/4.0/>).

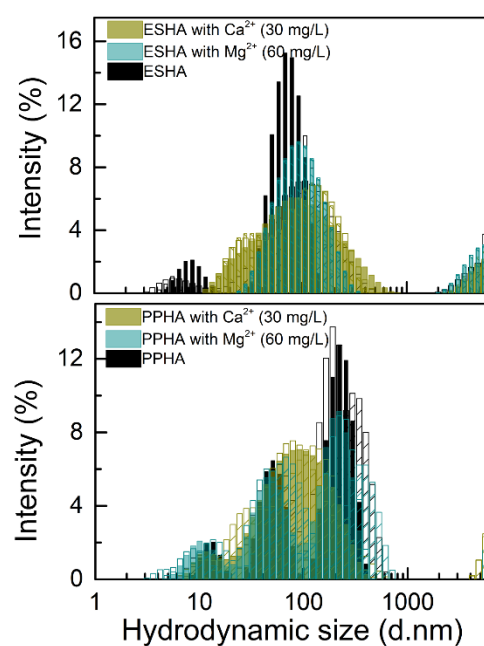

**Figure S2.** Effects of  $\text{Ca}^{2+}$  and  $\text{Mg}^{2+}$  on the hydrodynamic size of ESHA (60 mg C/L) and PPHA (100 mg C/L) aqueous solution (pH 7.5).

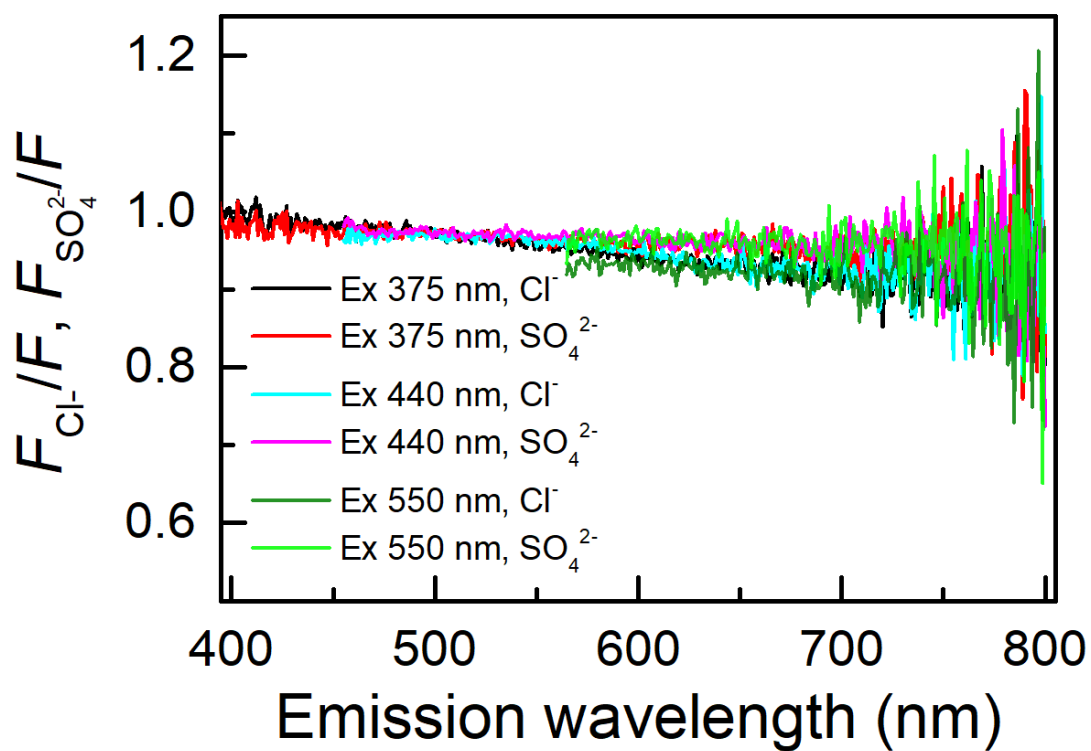

**Figure S3.** The ratio of fluorescence intensity in the presence of  $\text{Cl}^-$  ( $F_{\text{Cl}}$ ) or  $\text{SO}_4^{2-}$  ( $F_{\text{SO}_4}$ ) to the fluorescence intensity in the absence of anionic ions ( $F$ ).

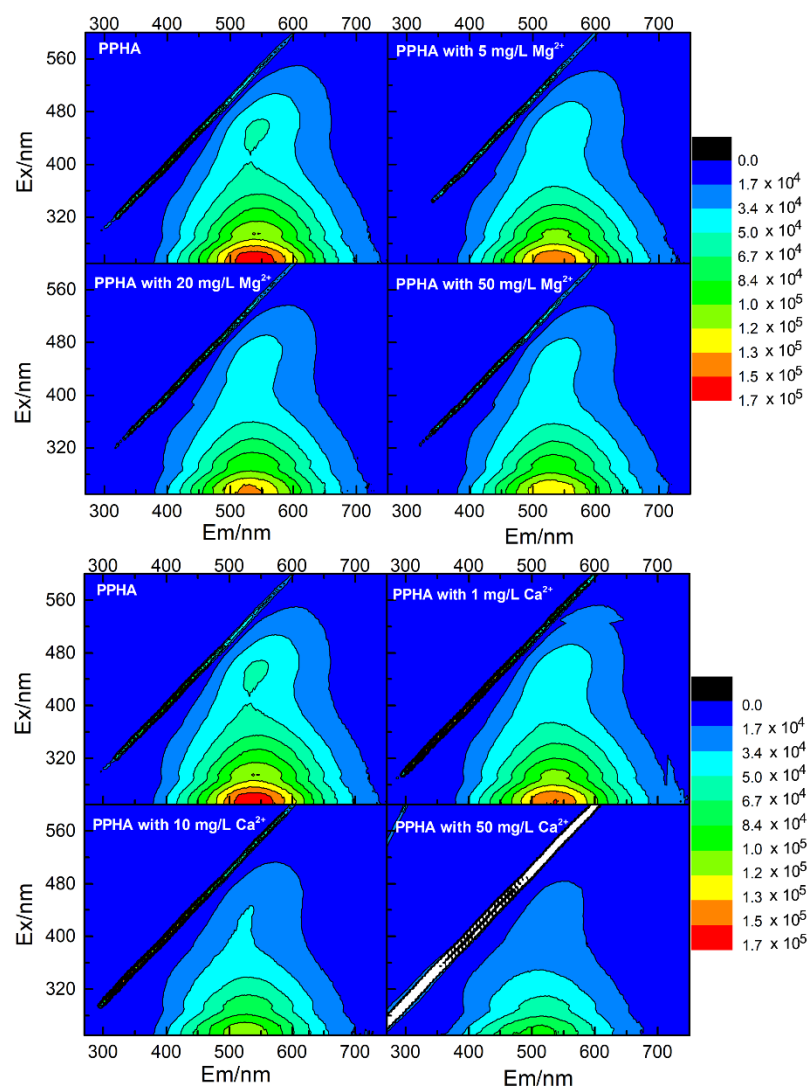

**Figure S4.** Effects of  $\text{Mg}^{2+}$  and  $\text{Ca}^{2+}$  on the EEM spectra of PPHA (10 mg C/L) aqueous solution.

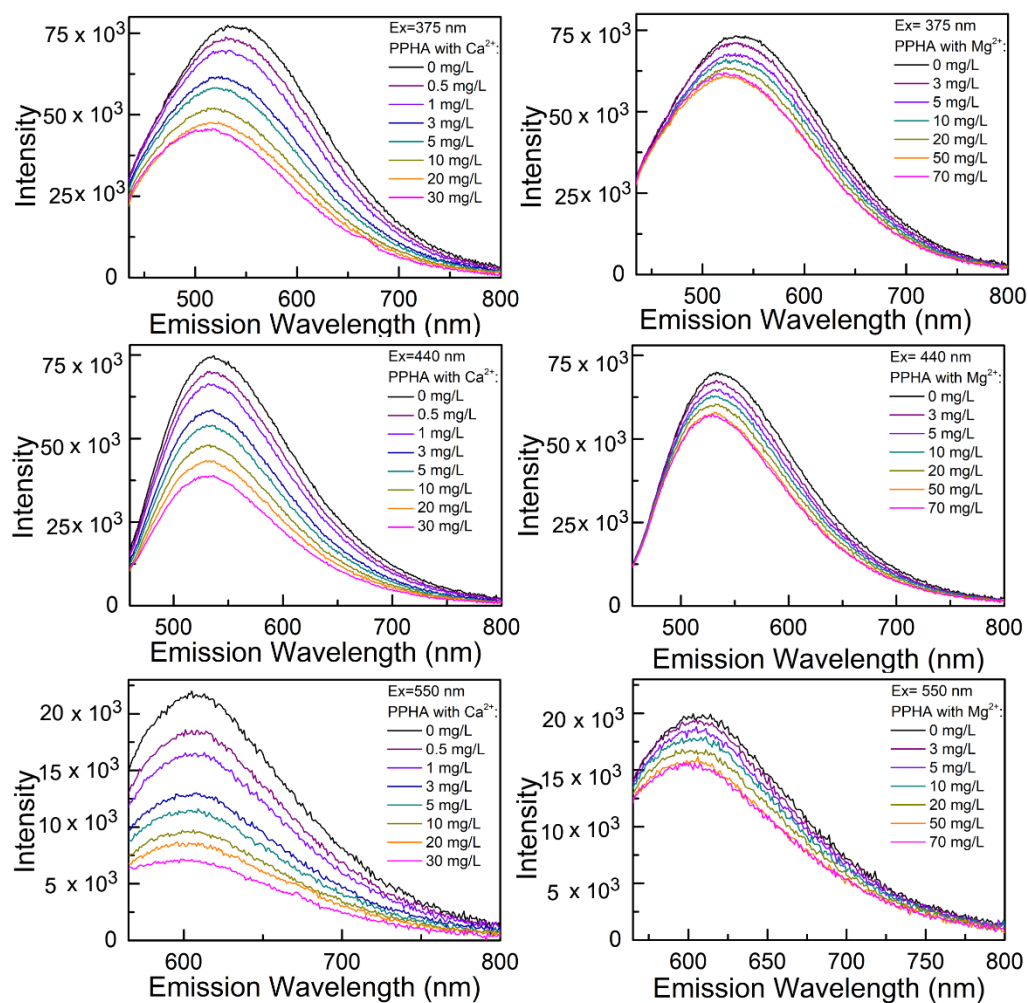

**Figure S5.** Effects of  $\text{Mg}^{2+}$  and  $\text{Ca}^{2+}$  on the steady-state fluorescence spectra of PPHA (10 mg C/L) aqueous solution at excitation of 375, 440, and 550 nm.

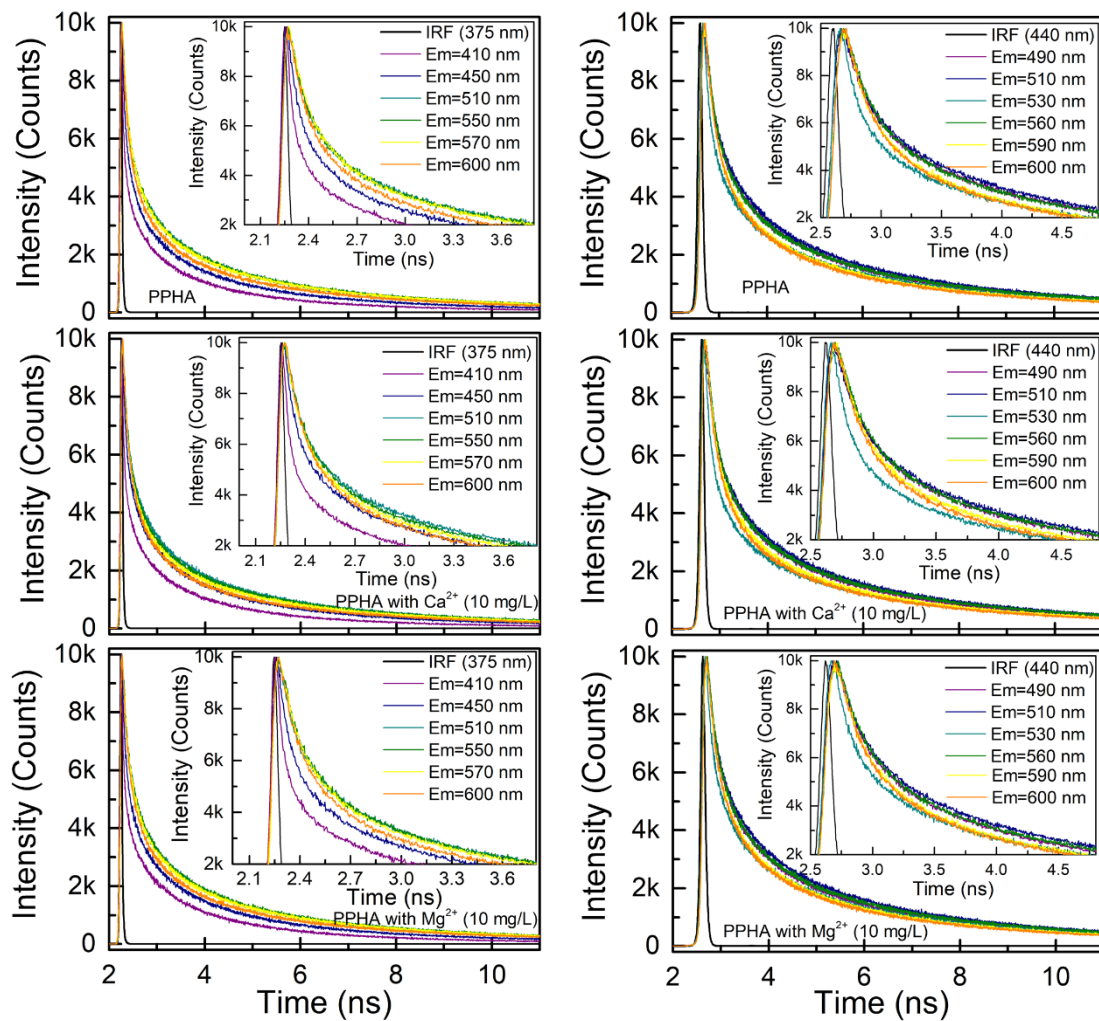

**Figure S6.** Effects of  $\text{Mg}^{2+}$  (10 mg/L) and  $\text{Ca}^{2+}$  (10 mg/L) on the time-resolved fluorescence spectra of PPHA (10 mg C/L) aqueous solution at excitation of 375 and 440 nm.

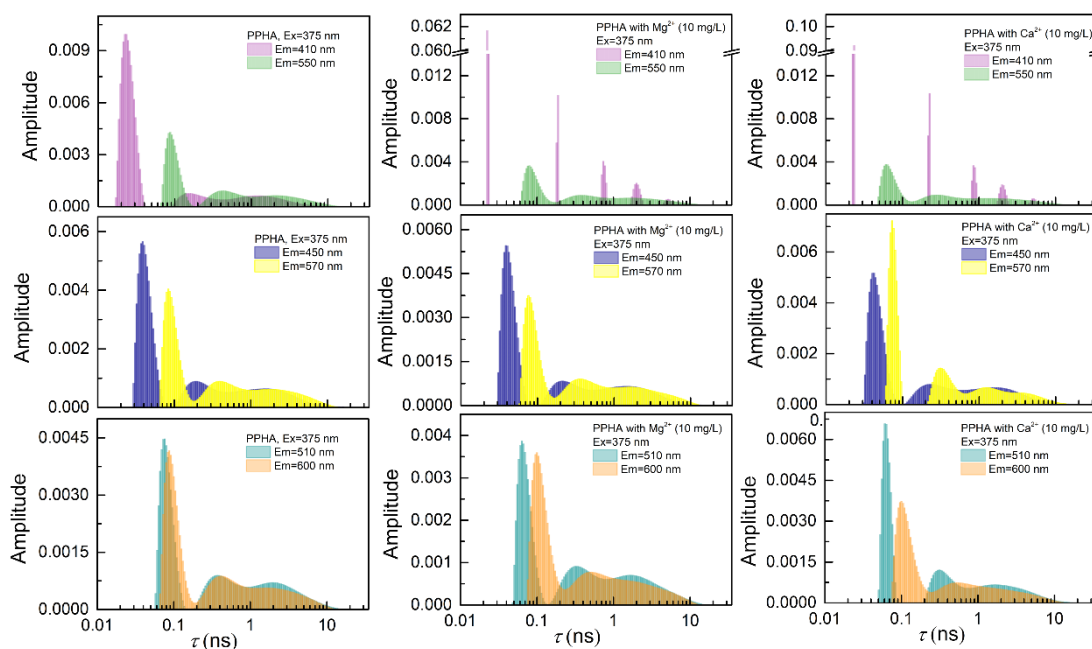

**Figure S7.** Lifetime distributions for emission decays of PPHA (10 mg C/L) aqueous solution at excitation of 375 and 440 nm,  $\text{Mg}^{2+}$  (10 mg/L) and  $\text{Ca}^{2+}$  (10 mg/L).

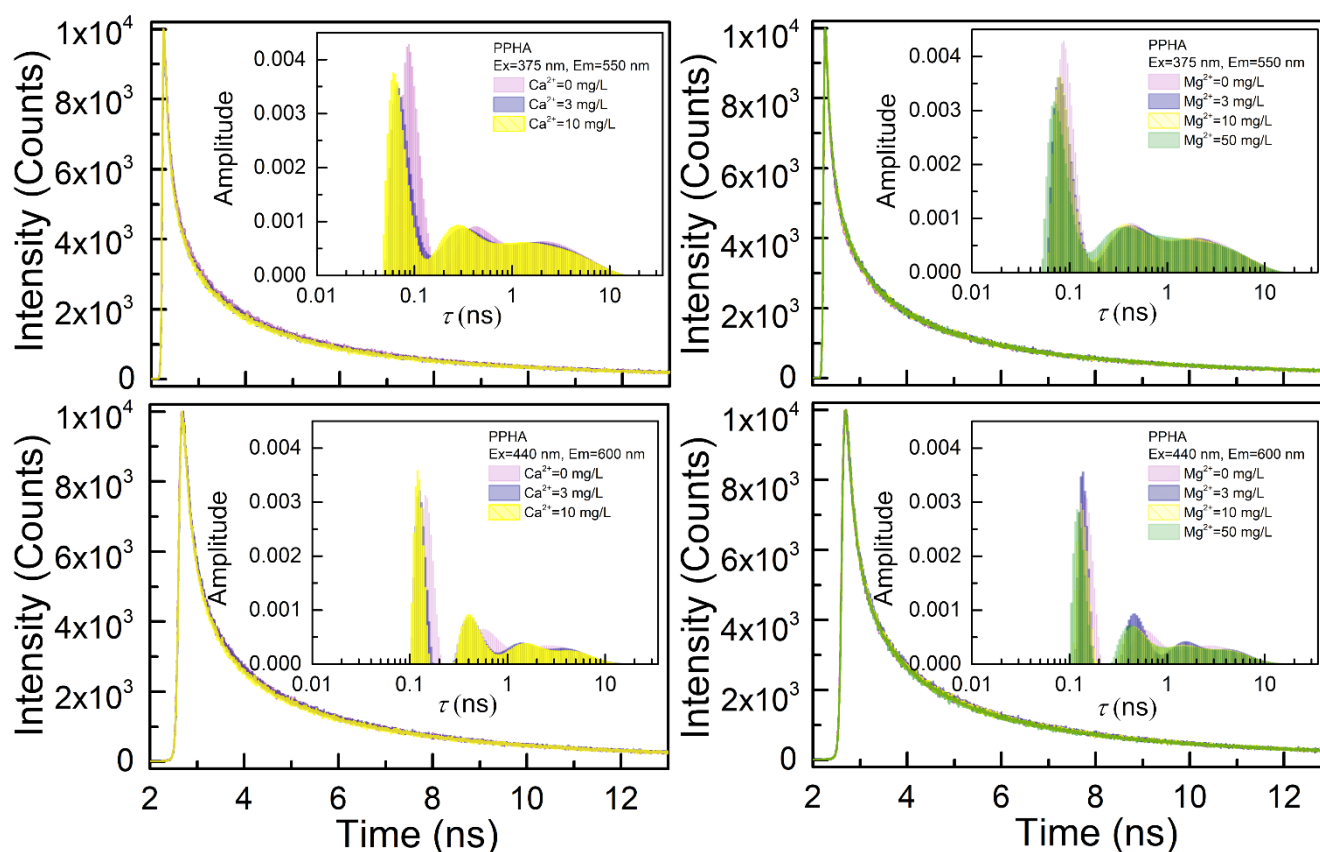

**Figure S8.** Effects of  $\text{Mg}^{2+}$  and  $\text{Ca}^{2+}$  concentrations on the lifetime distributions for emission decays of PPHA (10 mg C/L) aqueous solution at excitation of 375 nm.

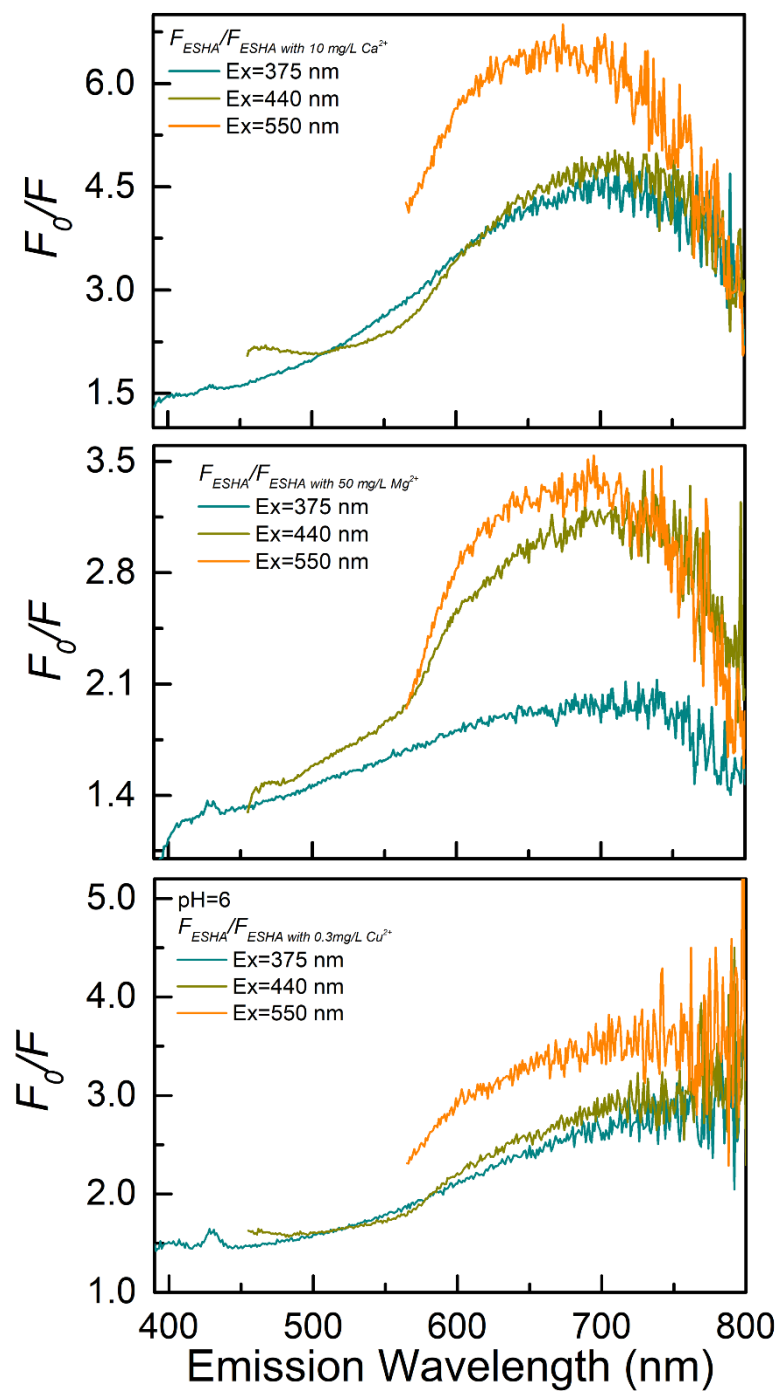

**Figure S9.** Effects of excitation and emission wavelength on the fluorescence quenching of ESHA (10 mg C/L) aqueous solution by  $\text{Mg}^{2+}$ ,  $\text{Ca}^{2+}$ , and  $\text{Cu}^{2+}$ .
